# Supplementary material for: Extending the I-squared statistic to describe treatment effect heterogeneity in cluster, multi-centre randomized trials and individual patient data meta-analysis
Source: PubMed Central journal article supplement (PMC8173367; doi:10.1177/0962280220948550), 2020-09-21
Supplement: sj-pdf-1-smm-10.1177_0962280220948550.pdf [file sj-pdf-1-smm-10.1177_0962280220948550.pdf]

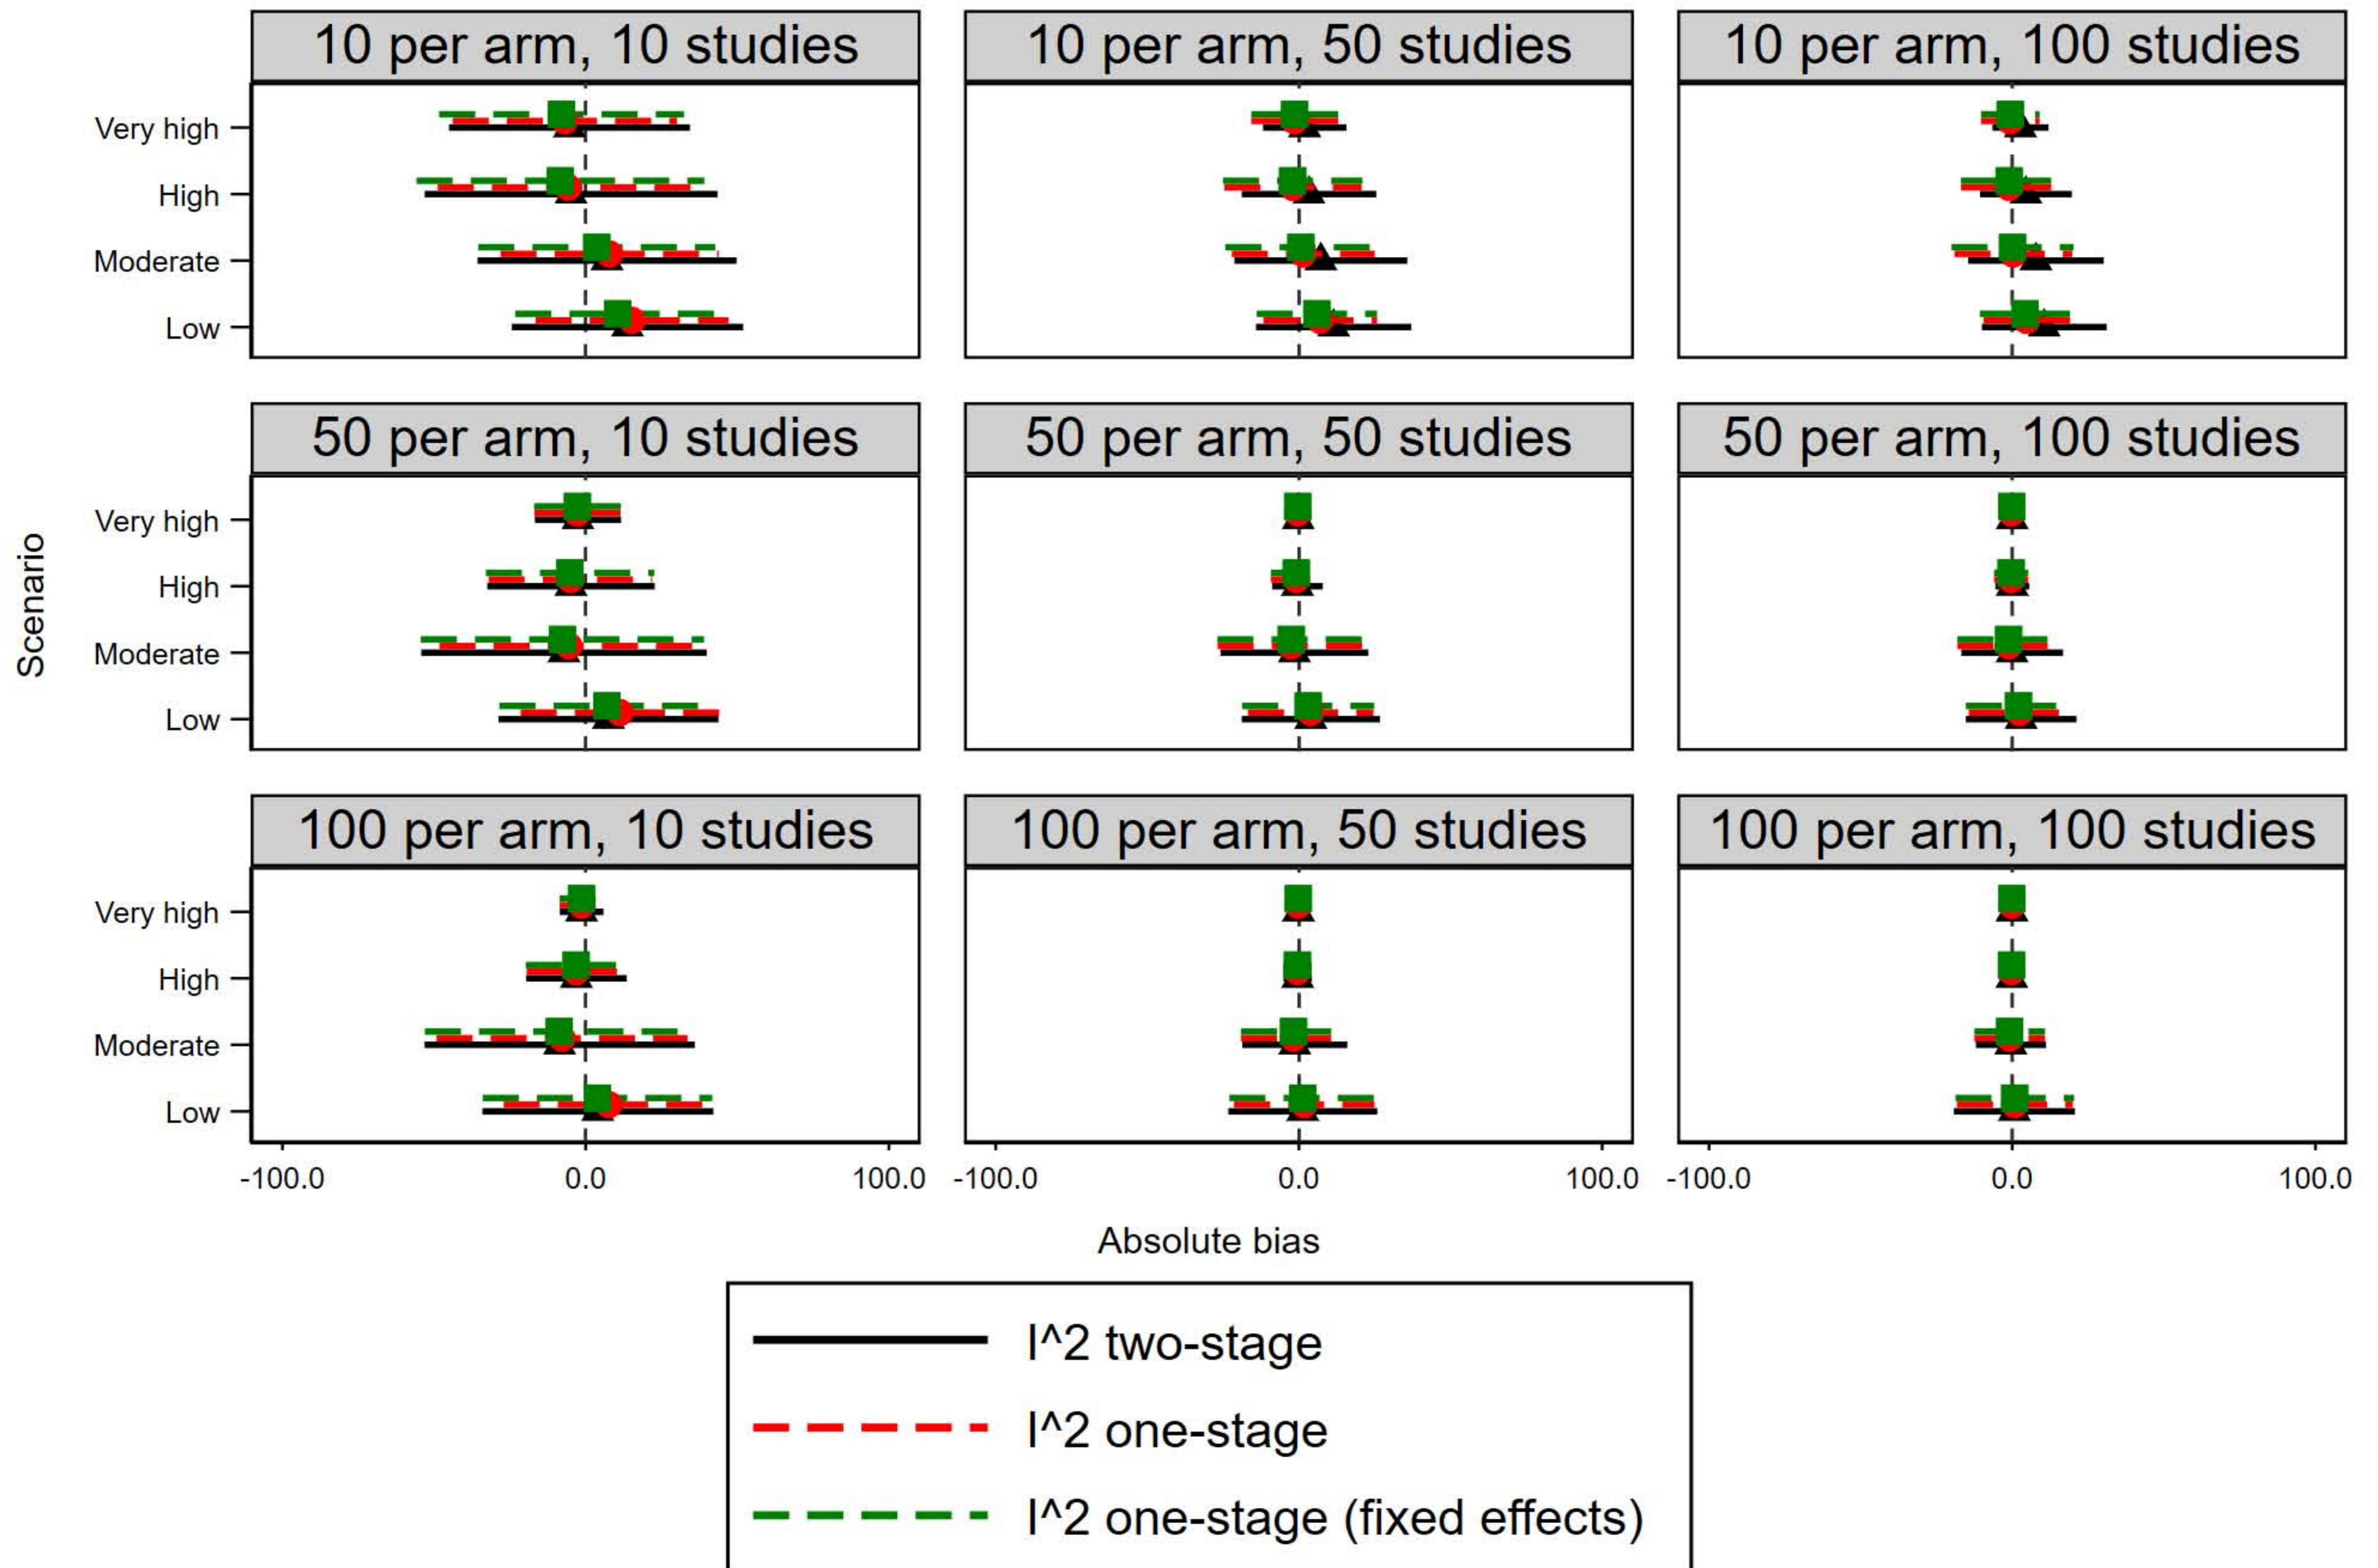

Graphs by Number per arm and Number studies per arm
